# Supplementary material for: Unraveling the interfacial compatibility of ultrahigh nickel cathodes and chloride solid electrolyte for stable all-solid-state lithium batteries
Source: Royal Society of Chemistry journal article supplement (doi:10.1039/d4ee01302f), 2024-01-01
Supplement: d4ee01302f1.pdf [file d4ee01302f1.pdf]

**Electronic Supplementary Material (ESI) for Energy & Environmental Science.**  
**This journal is © The Royal Society of Chemistry 2024**

## **Electronic Supplementary Information**

### **Unraveling interfacial compatibility of ultrahigh nickel cathode and chloride solid electrolyte for stable all-solid-state lithium battery**

Feng Li<sup>1</sup>, Ye-Chao Wu<sup>2,3</sup>, Xiao-Bin Cheng<sup>2</sup>, Yihong Tan<sup>4</sup>, Jin-Da Luo<sup>2</sup>, Ruijun Pan<sup>3</sup>, Tao Ma<sup>5</sup>, Lei-Lei Lu<sup>1</sup>, Xiaolei Wen<sup>6</sup>, Zheng Liang<sup>4\*</sup>, Hong-Bin Yao<sup>1,2\*</sup>

*<sup>1</sup>Division of Nanomaterials and Chemistry, Hefei National Research Center for Physical Sciences at the Microscale, University of Science and Technology of China, Hefei, Anhui 230026, China*

*<sup>2</sup>Department of Applied Chemistry, University of Science and Technology of China, Hefei, Anhui 230026, China*

*<sup>3</sup>Hefei Gotion High-tech Power Energy Co., Ltd. Hefei, Anhui 230012, China*

*<sup>4</sup>Frontiers Science Center for Transformative Molecules, School of Chemistry and Chemical Engineering, Shanghai Jiao Tong University, Shanghai 200240, China*

*<sup>5</sup>Engineering Research Center of High-frequency Soft Magnetic Materials and Ceramic Powder Materials of Anhui Province, School of Chemistry and Material Engineering, Chaohu University, Hefei, 238024, China*

*<sup>6</sup>Center for Micro and Nanoscale Research and Fabrication, University of Science and Technology of China, Hefei, Anhui 230026, China*

*F.L., Y.-C.W., X.C., and Y.T. contributed equally to this work.*

\* Corresponding authors' email: yhb@ustc.edu.cn, liangzheng06@sjtu.edu.cn

## Experimental Section

**Synthesis of  $\text{Li}_2\text{TaCl}_7$  SEs.** The  $\text{Li}_2\text{TaCl}_7$  were obtained by ball milling LiCl (anhydrous, Aladdin) and  $\text{TaCl}_5$  (anhydrous, Aladdin). The ratio of LiCl and  $\text{TaCl}_5$  powders was set as 2:1 and mixed and then loaded into tungsten carbide pots and ball-milled at 450 rpm for 180 h. The mass ratio of tungsten carbide ball mill beads to the precursors is 55:1. The obtained fine solid electrolyte powders were collected and stored in the glovebox for further application and characterization. All of the preparation processes were conducted in an argon-filled glove box with  $\text{H}_2\text{O}$  and  $\text{O}_2$  concentrations less than 0.1 ppm.

**Characterizations.** The obtained solid electrolyte powders were cold-pressed into 10 mm diameter pellets by a hydraulic press (YLJ-15T-LD, Hefei Kejing Materials Technology Co., Ltd.) at 370 MPa for 3 minutes for alternating current (AC) impedance measurement. The ionic conductivity and activation energy were obtained by impedance in the temperature range from 25 to 60 °C with an applied frequency of 1 Hz to 7 MHz and a constant voltage of 20 mV using a Bio-Logic VMP3. Powder X-ray diffraction patterns were obtained by the Philips X'Pert PRO SUPER X-ray diffractometer using Cu  $K\alpha$  radiation ( $\lambda = 1.54178 \text{ \AA}$ ). The exposed morphologies of ASSLB composite cathodes with different cycled states in depth were captured with the application of  $\text{Ga}^+$  with a 30 kV focused ion beam (FIB, ORION Nanofab, Zeiss). Prior to the measurement, the cathodes were dismantled from the ASSLBs and stuck on the sample tables carefully in an argon-filled glovebox with  $\text{H}_2\text{O}$  and  $\text{O}_2$  concentrations less than 0.1 ppm.

**Electrochemical measurements of ASSLBs.** Single-crystal  $\text{LiNi}_{0.92}\text{Co}_{0.05}\text{Mn}_{0.03}\text{O}_2$  (S-NCM92, provided by Hefei Gotion High-tech Power Energy Co., Ltd.) was firstly mixed with  $\text{Li}_2\text{TaCl}_7$  and polytetrafluoroethylene (PTFE) (Guangdong Canrd New Energy Technology Co., Ltd.) with a mass ratio of 75:22:3 and then mixed by a miniature vibration mixer (MSK-SFM-12 M, Hefei Kejing Materials Technology Co., Ltd) for 60 min as cathode composite powders. 100 mg of  $\text{Li}_2\text{TaCl}_7$  powder was first placed into a polyetheretherketone (PEEK) model (10 mm diameter) and pressed at 1.5 tons for 1 min to form a SE layer. The composite cathode powder with a range of areal capacity of 1-5 mAh  $\text{cm}^{-2}$  was then spread over the surface of the  $\text{Li}_2\text{TaCl}_7$  and pressed at 2.5 tons for another 3 min. 40 mg of  $\text{Li}_6\text{PS}_5\text{Cl}$  powder was dispersed evenly on the other surface of the  $\text{Li}_2\text{TaCl}_7$  layer and then pressed at 3 tons for 3 min. Then, a piece of In foil (0.1 mm thickness, 10 mm diameter, 3A Materials) was attached to the surface of  $\text{Li}_6\text{PS}_5\text{Cl}$ . A Li foil (6 mm diameter, China Energy Lithium Co., Ltd.) with a weight ratio of Li: In=1:50 was subsequently attached to the In foil. Subsequently, the ASSLB was pressed at 1 ton for

another 1 min and then placed into a custom-made stainless-steel casing (Ningbo Zhengli New Energy Technology Co., Ltd.) with a constantly applied pressure of 100 MPa for 24 hours to form the Li-In alloy. The ASSLB was placed into a custom-made stainless-steel casing for galvanostatic cycling. Galvanostatic cycling (current density: 0.191, 1, and 3 mA cm<sup>-2</sup>) of the ASSLBs was conducted at 30 °C with a constantly applied pressure of 100 MPa. The voltage range of the cycling was 2.8-4.1 V, 2.8-4.3 V, 2.8-4.6 V, and 2.8-4.8 V versus Li<sup>+</sup>/Li using a LAND-CT2001A and Neware-CT-4008T battery cycler. For the aging of ASSLBs, galvanostatic charging was conducted at a current density of 0.191 mA cm<sup>-2</sup>, followed by constant voltage charging and aging at the designated cut-off voltage for a specified duration. All of the preparation processes were conducted in an argon-filled glove box with H<sub>2</sub>O and O<sub>2</sub> concentrations less than 0.1 ppm.

**Time-of-flight secondary ion mass spectrometry (ToF-SIMS).** For the time-of-flight secondary-ion mass spectrometry (ToF-SIMS) studies, ION-ToF-SIMS 5-100 was used with the pressure of the analysis chamber below  $1.1 \times 10^{-9}$  mbar. The imaging with delay extraction mode with pulsed 30 keV Bi<sup>3+</sup> (0.48 pA pulsed current) ion beam and a cycle time of 100 μs was applied for analysis. To minimize the effect of mass interference, the spectrometry (bunched) mode was used for surface analysis to enable a high signal intensity and a high mass resolution. The analysis area was set to  $100 \times 100 \mu\text{m}^2$  and rasterized with  $128 \times 128$  pixels, and every patch was analyzed with 1 frame and 1 shot per pixel and frame. The primary ion current was ca. 0.48 pA, and the stop condition was set to a primary ion dose of  $10^{12}$  ions cm<sup>2</sup>. To quantitatively compare the specific signal intensity, we collected 10 mass spectra at different areas on each cathode.

## Supplementary Figures

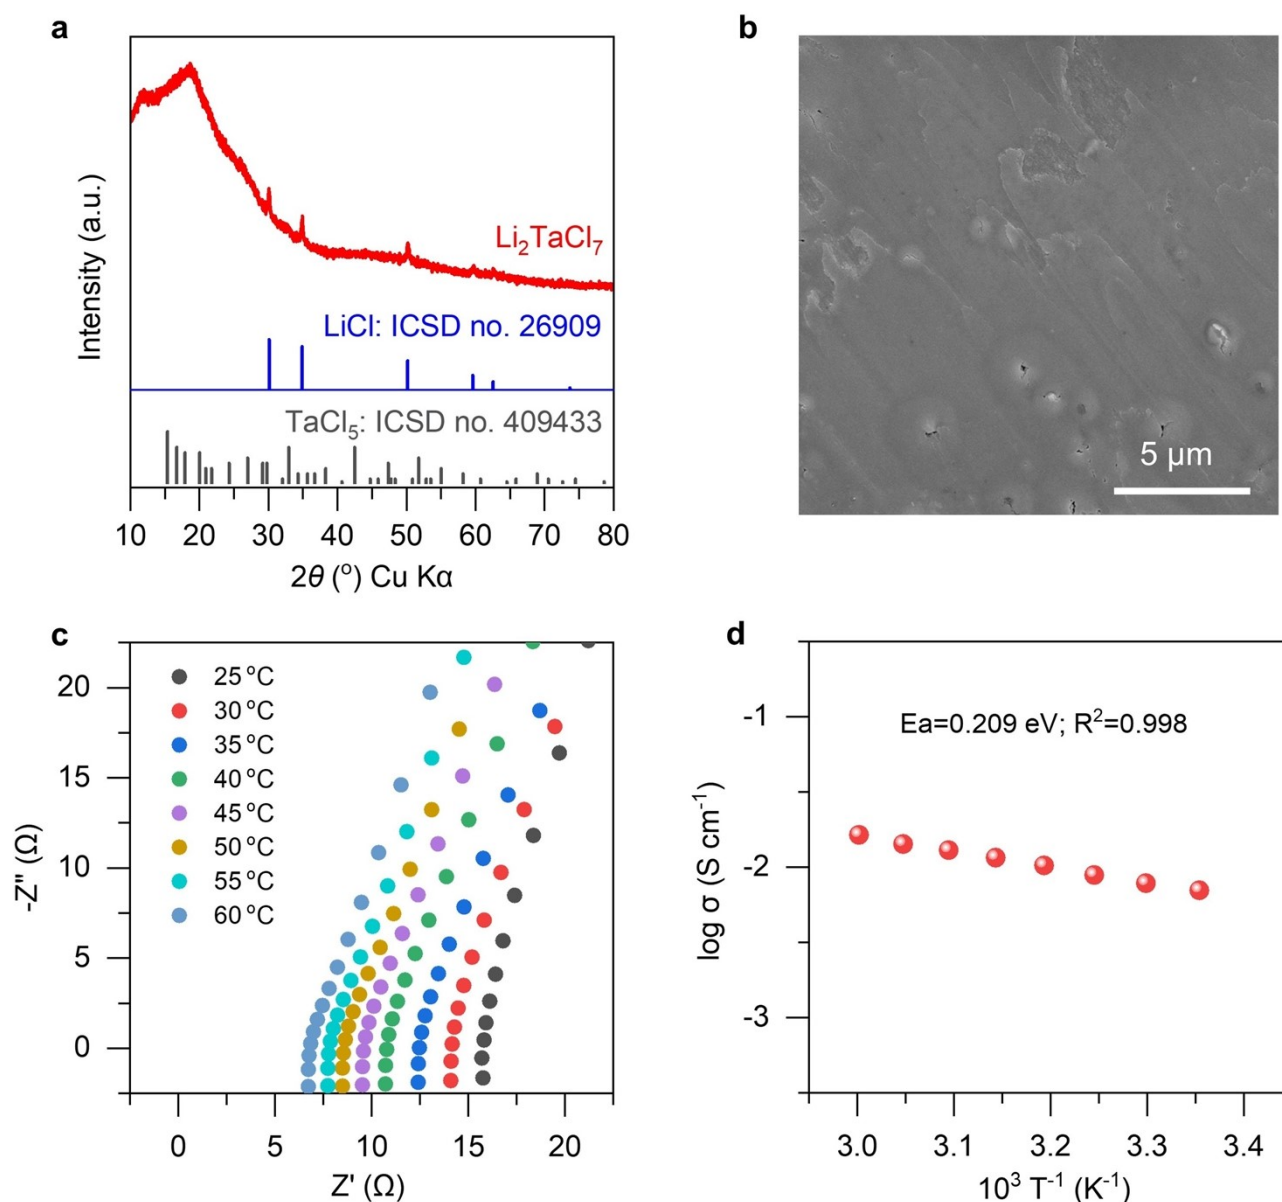

**Fig. S1 Characterization of the  $\text{Li}_2\text{TaCl}_7$ .** **a**, PXRD patterns of  $\text{Li}_2\text{TaCl}_7$ . The representative diffraction peaks patterns can be indexed with LiCl (ICSD no. 26909). **b**, SEM images for the surface of cold-pressed  $\text{Li}_2\text{TaCl}_7$  pellet. **c**, Nyquist plots of the EIS measurement results of  $\text{Li}_2\text{TaCl}_7$  with nonreversible electrodes in the temperature range from 25 to 60 °C. **d**, Arrhenius plot of ionic conductivities of the  $\text{Li}_2\text{TaCl}_7$ . The ionic conductivity of  $\text{Li}_2\text{TaCl}_7$  at room temperature is around 7.07 mS/cm.

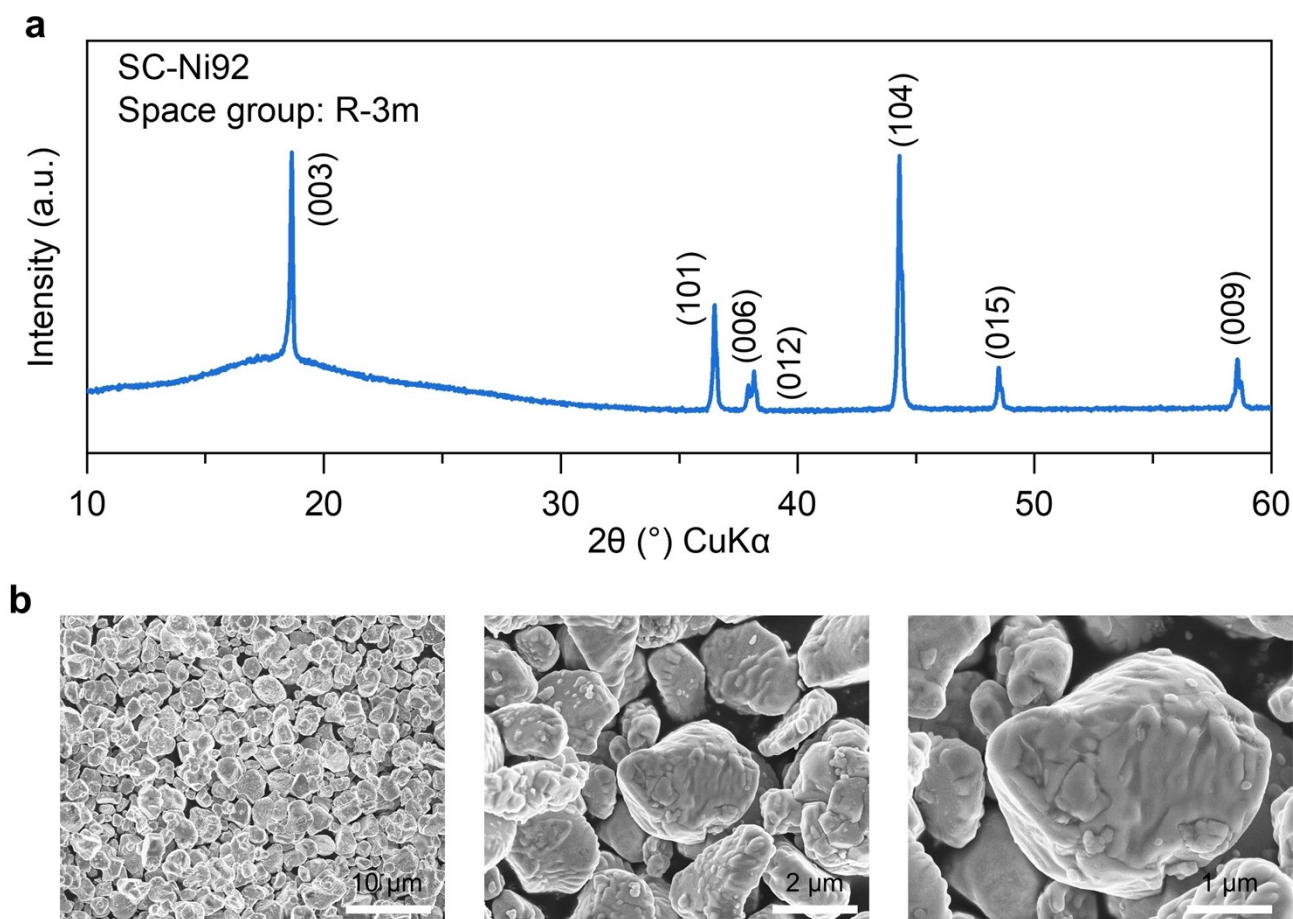

**Fig. S2 Characterizations of the S-Ni92.** **a**, PXRD pattern of S-Ni92 powders. **b**, SEM images of S-Ni92 powders.

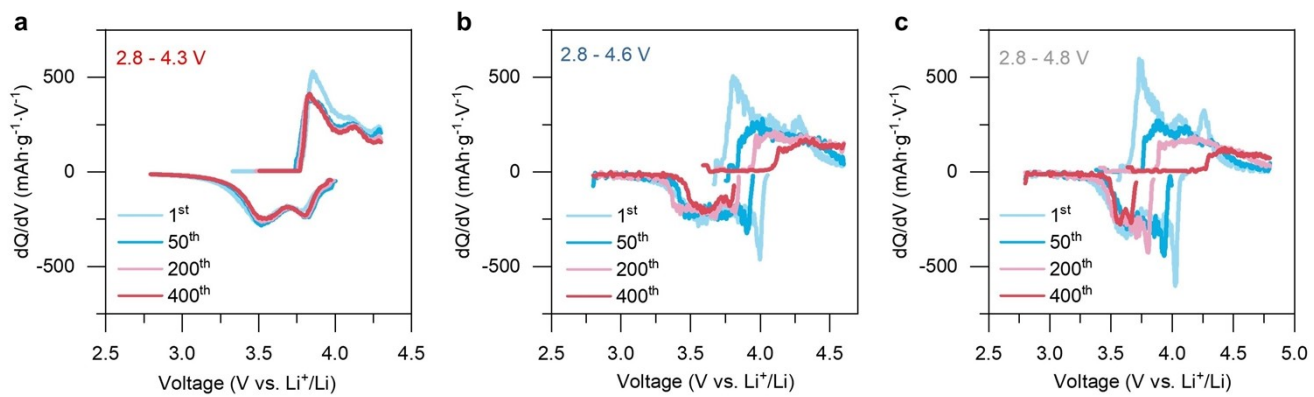

**Fig. S3 a-c**, Representative corresponding normalized  $dQ/dV$  curves of ASSLBs cycled with cut-off charging voltages of 4.3, 4.6, and 4.8 V, respectively.

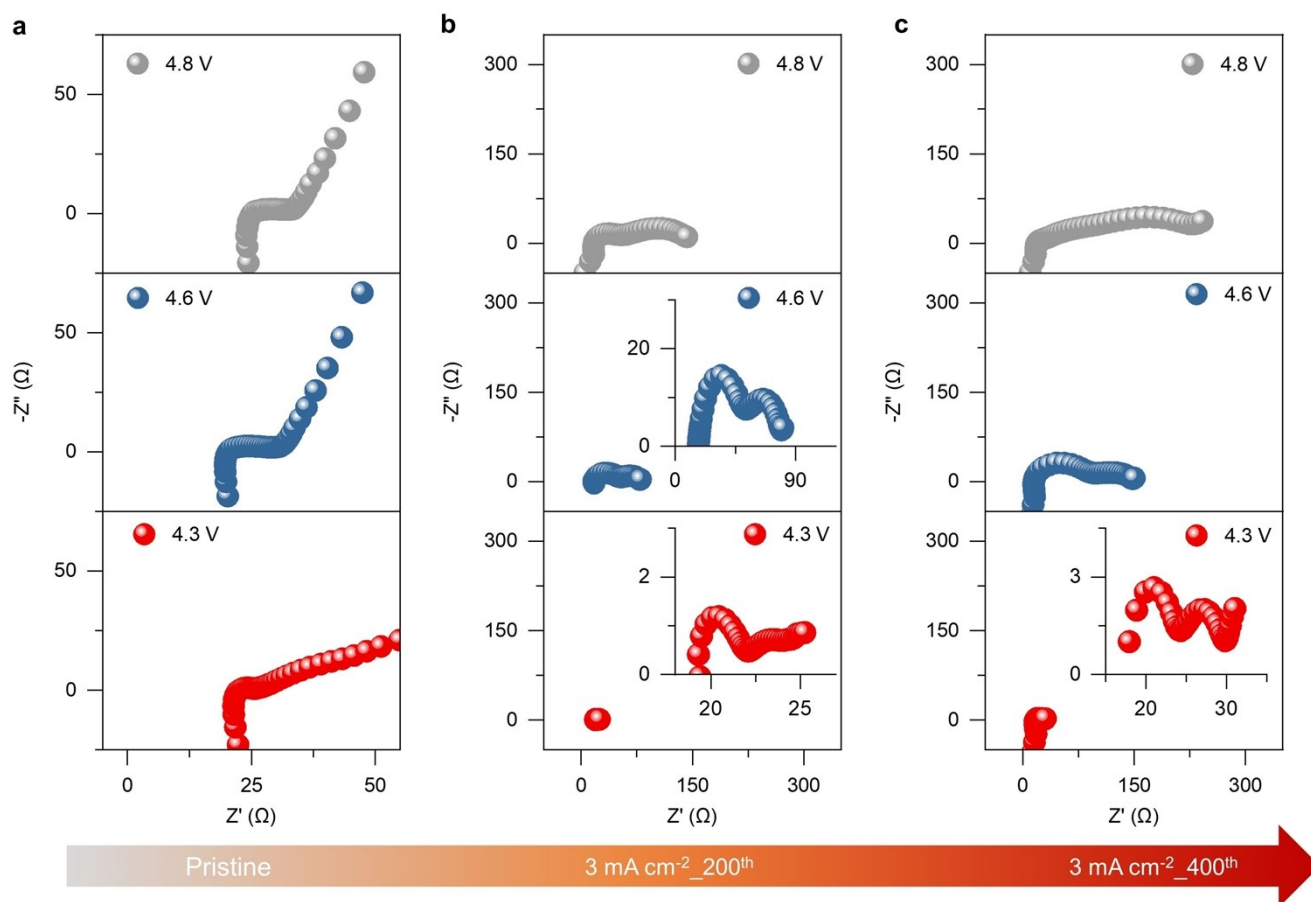

**Fig. S4 Evolution of internal resistance of ASSLBs during the cycling process.** a-c, Nyquist plots of the EIS measurement results of ASSLBs under pristine, 200<sup>th</sup>, and 400<sup>th</sup> cycle state.

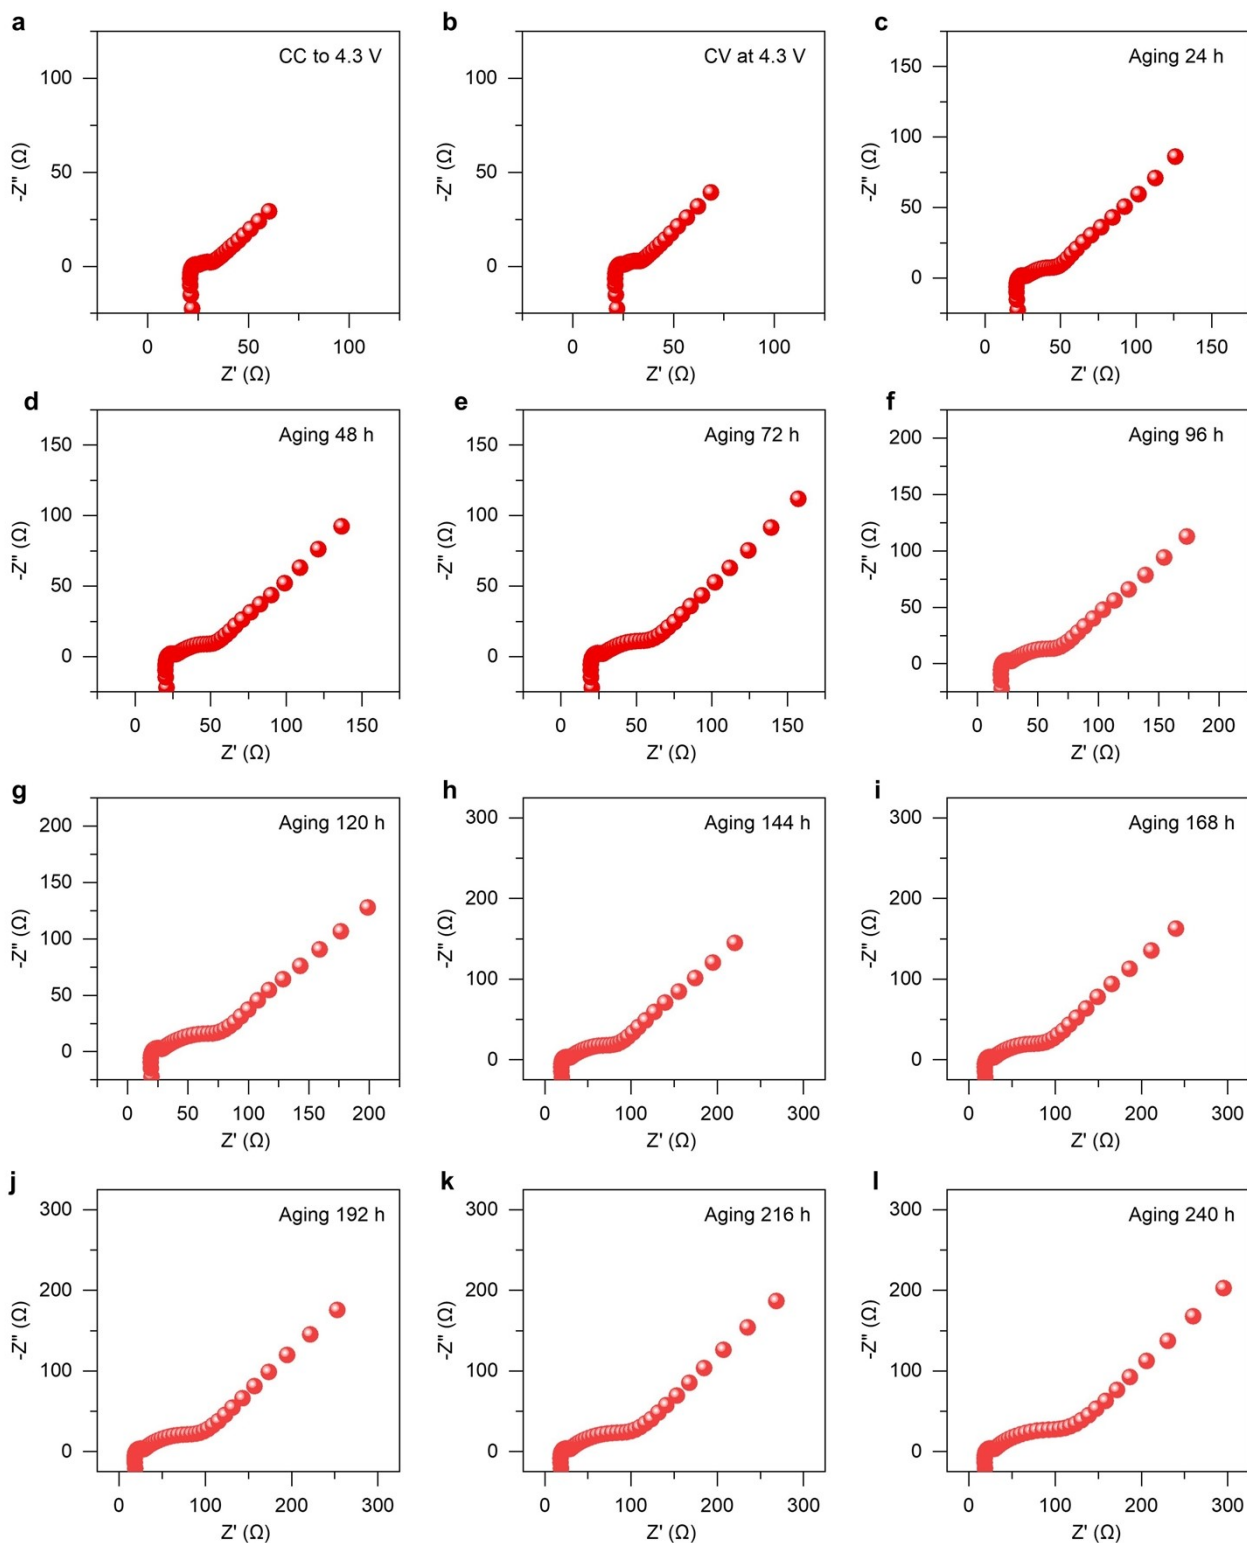

**Fig. S5 a-l**, Nyquist plots of the EIS measurement results of ASSLBs during the aging process with a constant voltage of 4.3 V.



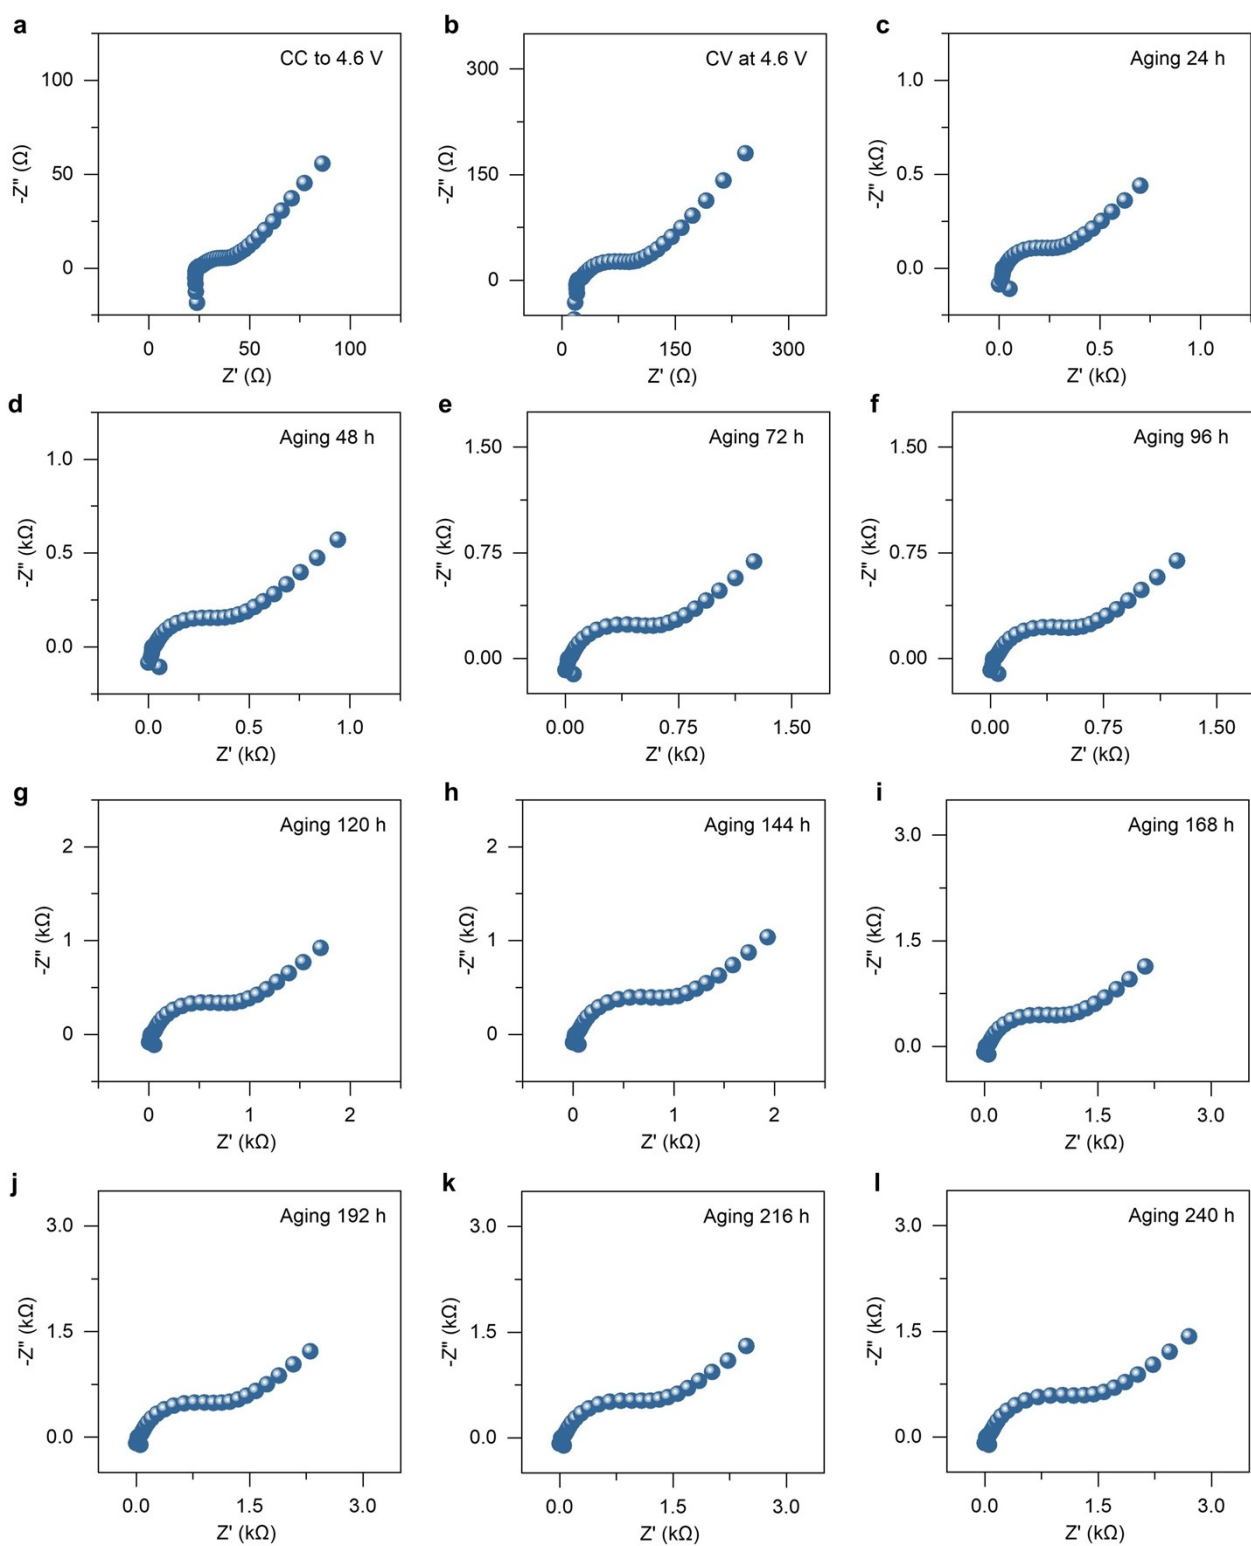

**Fig. S6 a-l**, Nyquist plots of the EIS measurement results of ASSLBs during the aging process with a constant voltage of 4.6 V.

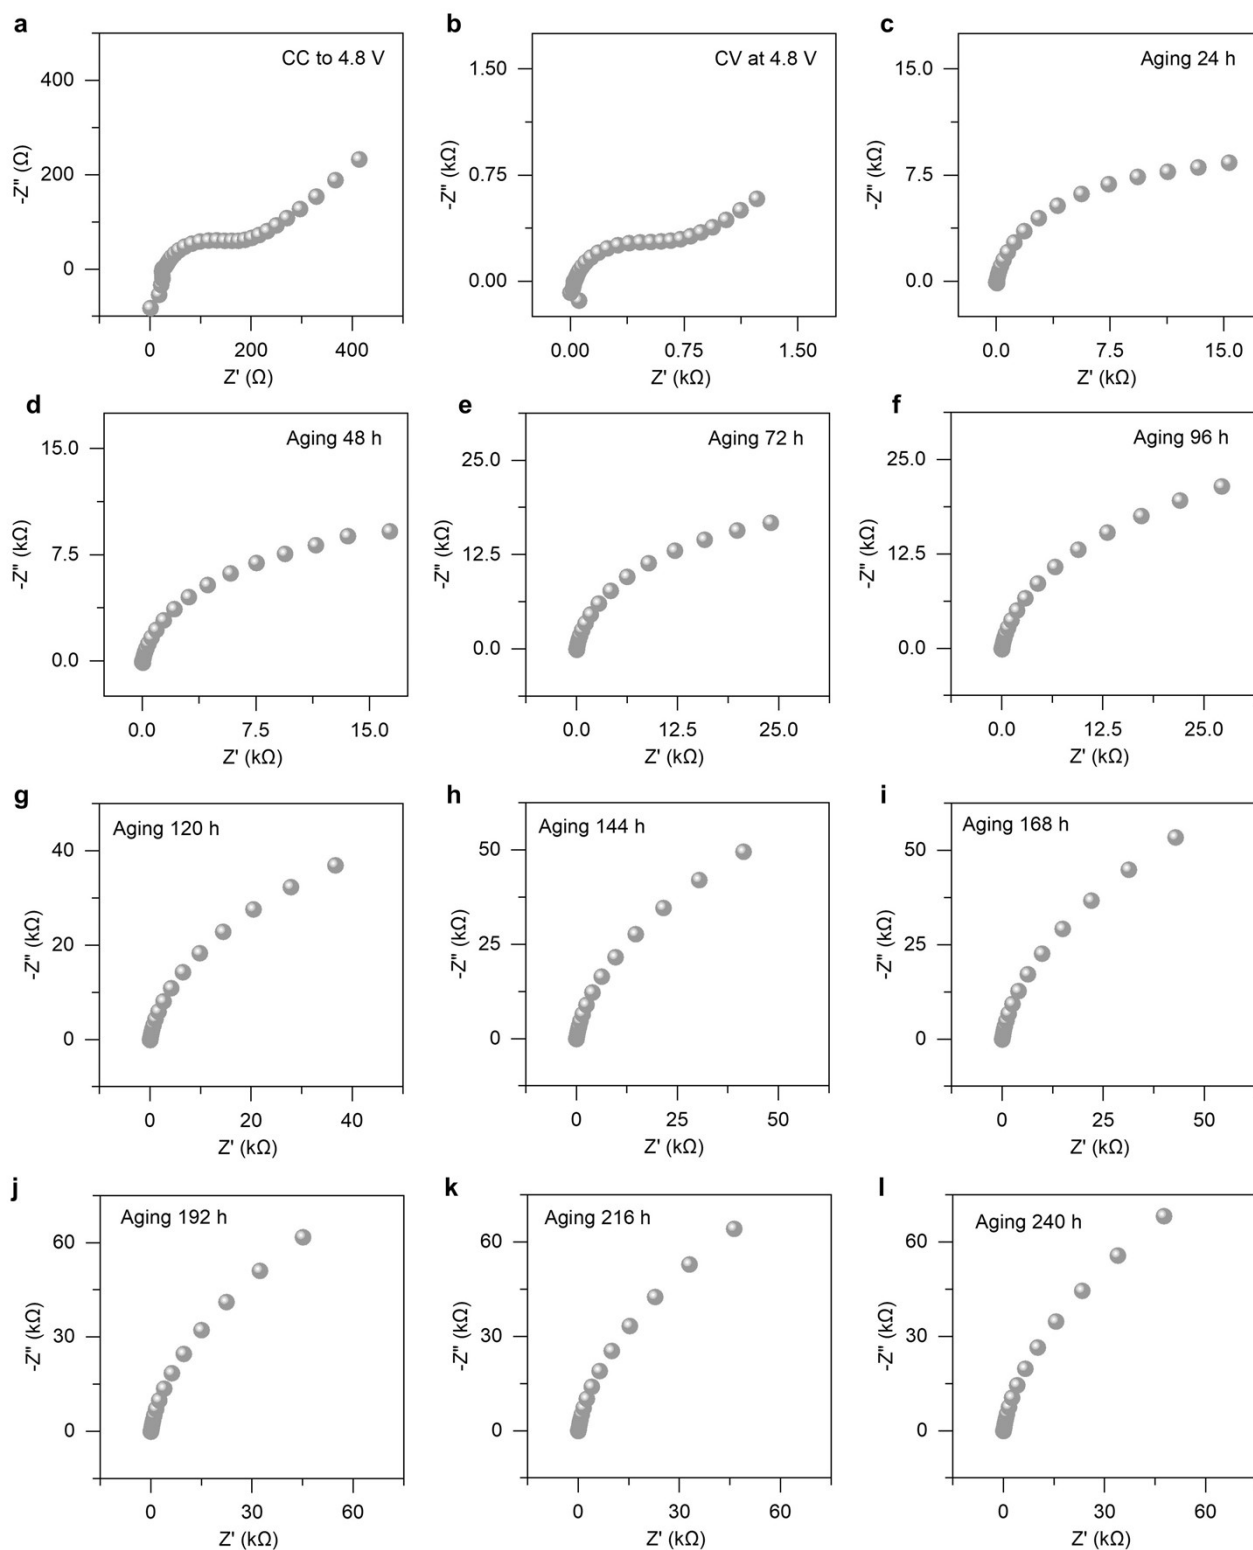

**Fig. S7 a-l**, Nyquist plots of the EIS measurement results of ASSLBs during the aging process with a constant voltage of 4.8 V.

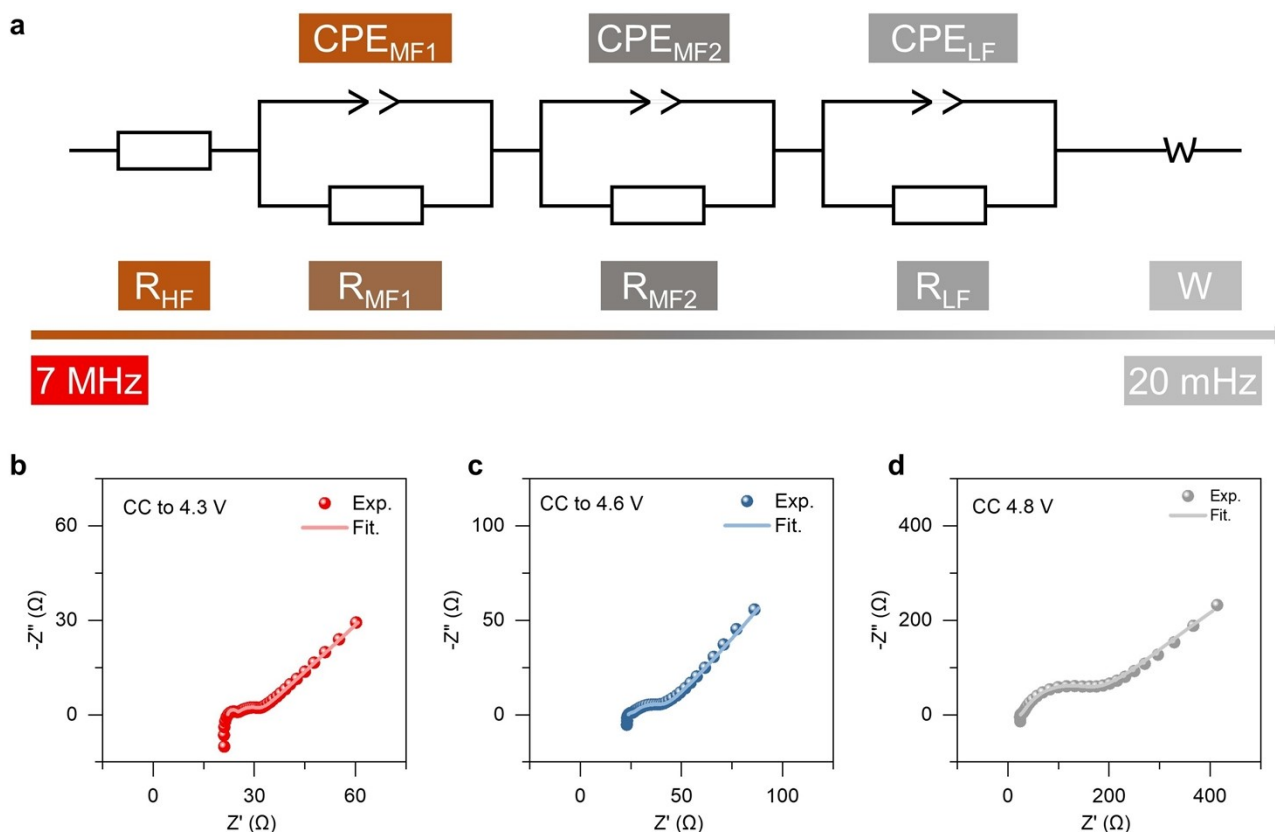

**Fig. S8 a**, The equivalent circuit employed to fit the Nyquist plots of the EIS results of ASSLBs. **b-d**, Representative fitted results of Nyquist plots of the EIS results of ASSLBs with the cut-off voltage of 4.3, 4.6, and 4.8 V.

### Constant Current Charging Process

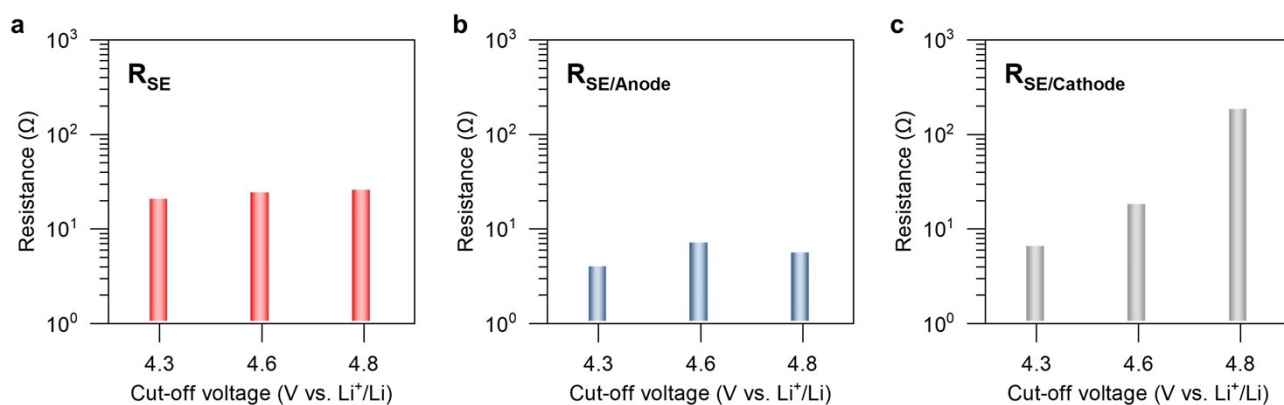

### Constant Voltage Charging Process

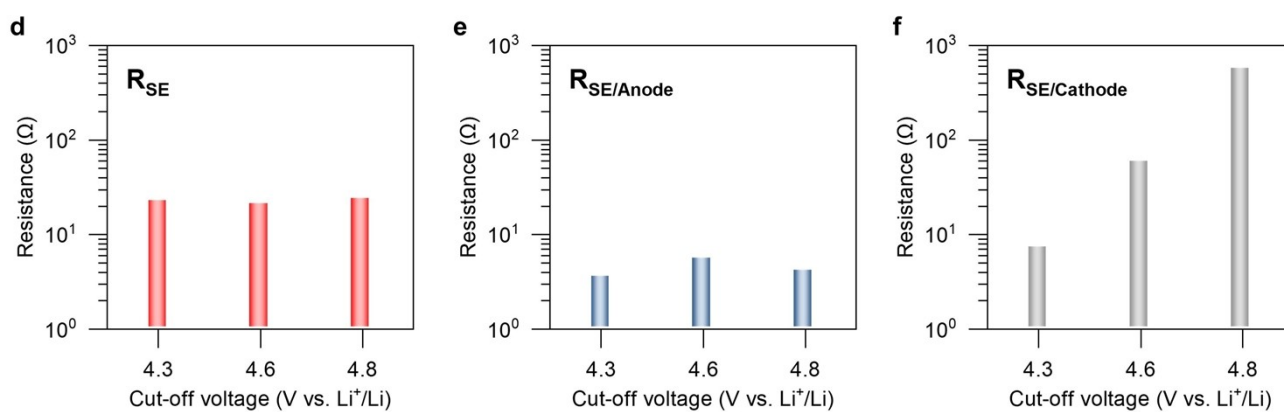

**Fig. S9 a-c**, The fitted resistance values of ASSLBs with constant current charged to 4.3, 4.6, and 4.8 V.

**d-f**, The fitted resistance values of ASSLBs with constant voltage charged to 4.3, 4.6, and 4.8 V.

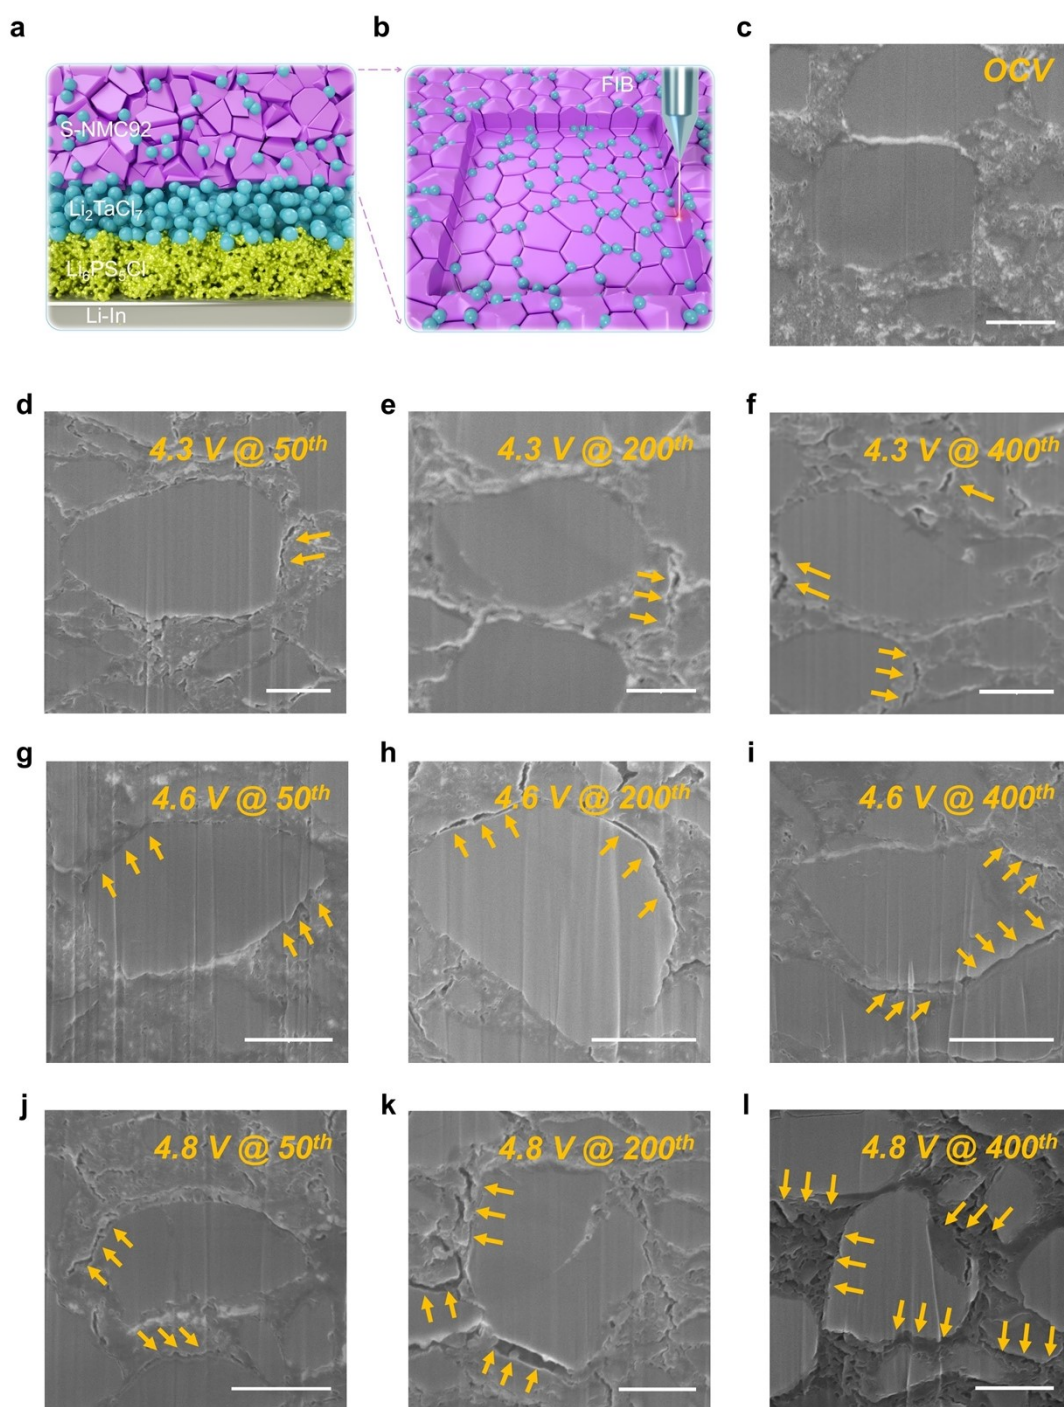

**Fig. S10 a-b**, Schematic illustration of the fabricated ASSLBs and the Focused ion beam technique used to expose the inside cathode. **c**, SEM image of the exposed surface of the pristine cathode. **d-f**, SEM images of the exposed surface of the cathode cycled with the charging voltage of 4.3 V at the 50<sup>th</sup>, 200<sup>th</sup>, and 400<sup>th</sup> cycle. **g-i**, SEM images of the exposed surface of the cathode cycled with the charging voltage of 4.6 V at the 50<sup>th</sup>, 200<sup>th</sup>, and 400<sup>th</sup> cycle. **j-l**, SEM images of the exposed surface of the cathode cycled with the charging voltage of 4.8 V at the 50<sup>th</sup>, 200<sup>th</sup>, and 400<sup>th</sup> cycle. The physical contact loss was marked by yellow arrows. Scale bar: 1  $\mu\text{m}$ .

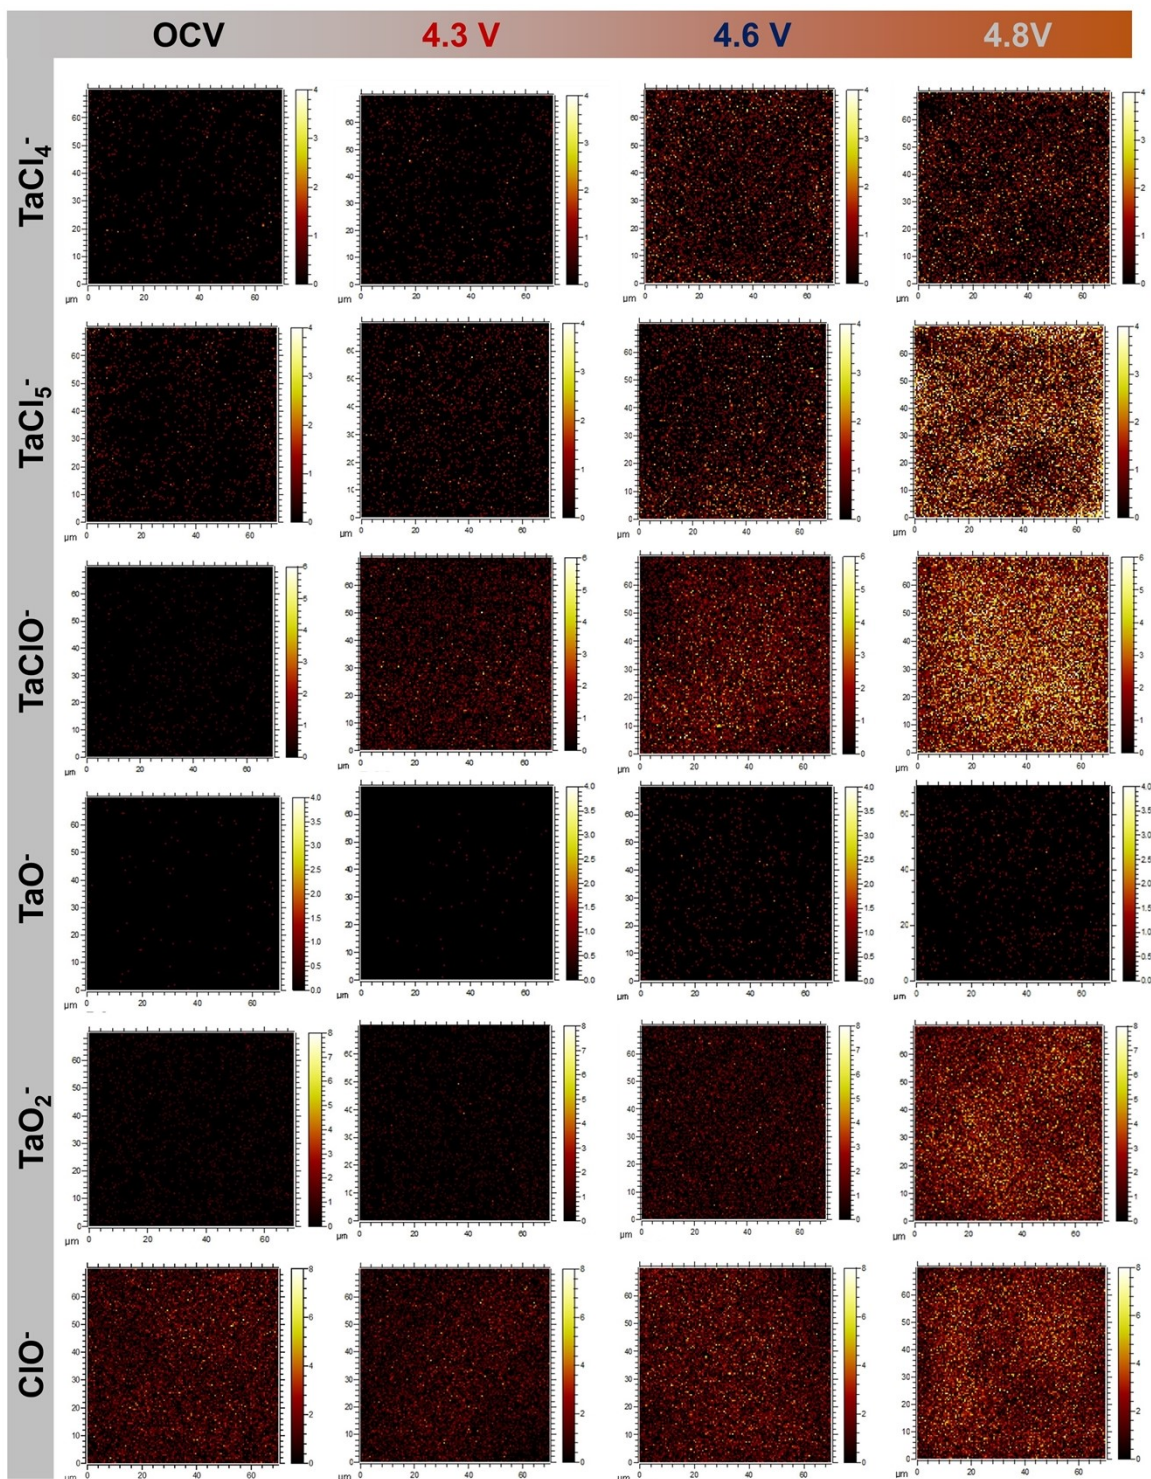

**Fig. S11** ToF-SIMS exemplary secondary ion images of negatively charged fragments of the composite cathodes with the OCV and aged state at 4.3, 4.6, and 4.8 V.

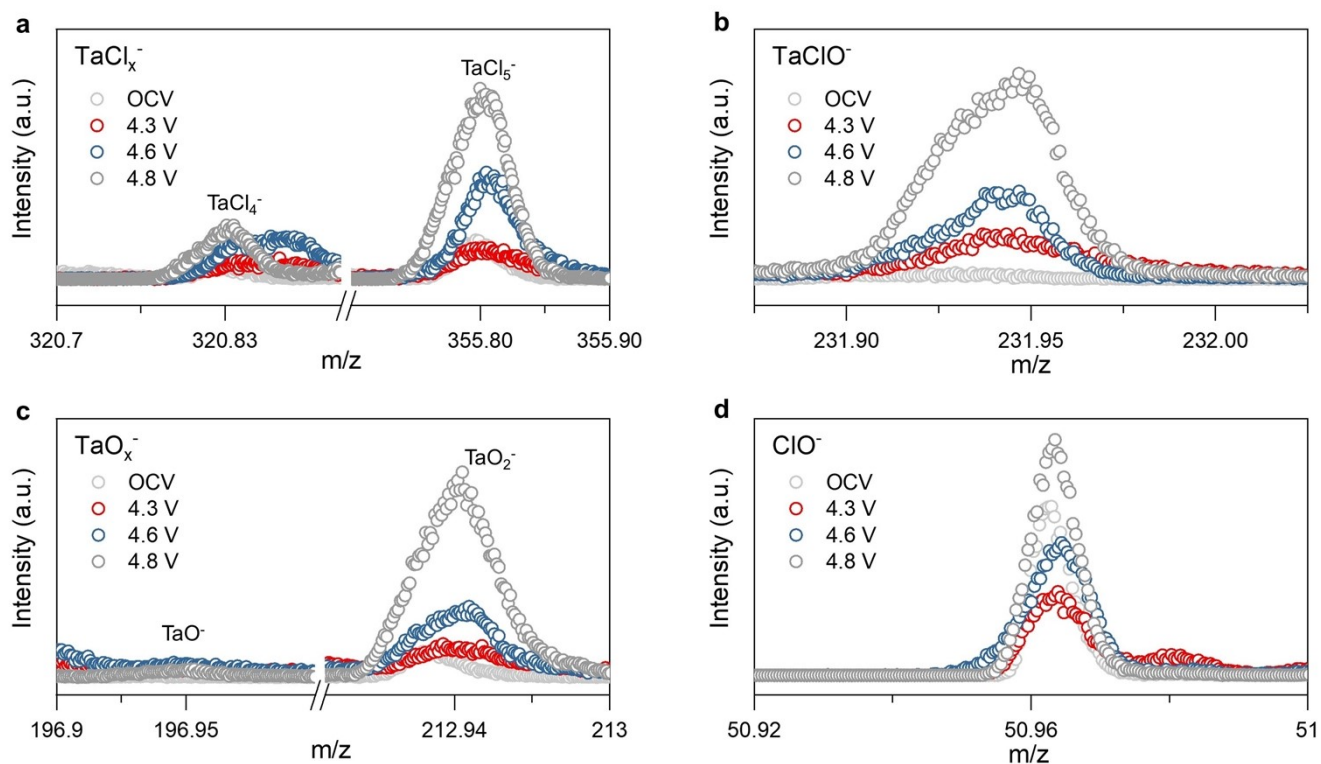

**Fig. S12 ToF-SIMS mass spectra of negatively charged fragments. a-d,** Evolution of the mass spectra of  $\text{TaCl}_x^-$  (a),  $\text{TaClO}^-$  (b),  $\text{TaO}_x^-$  (c), and  $\text{ClO}^-$  (d) fragments of the composite cathodes with the OCV and aged states at 4.3, 4.6, and 4.8 V, respectively.

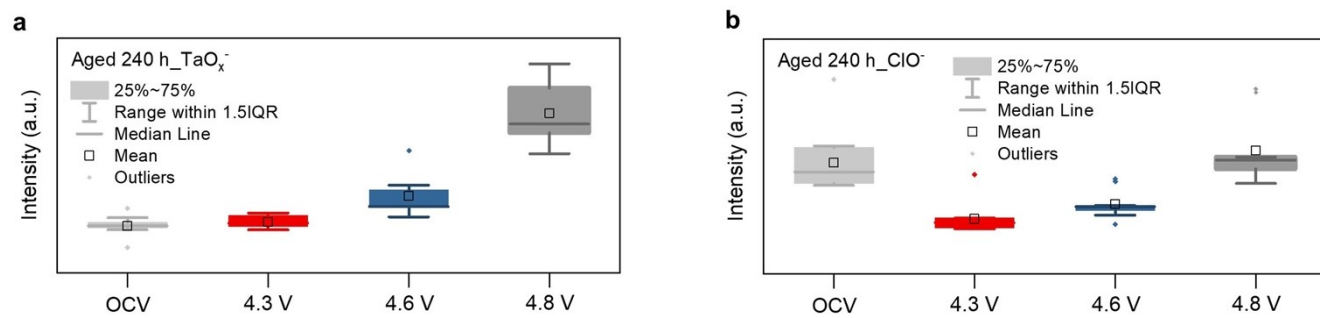

**Fig. S13 a-b**, Boxplots of the normalized intensity of  $\text{TaO}_x^-$  (a) and  $\text{ClO}^-$  (b) fragments of the composite cathodes with the OCV and aged states at 4.3, 4.6, and 4.8 V, respectively.



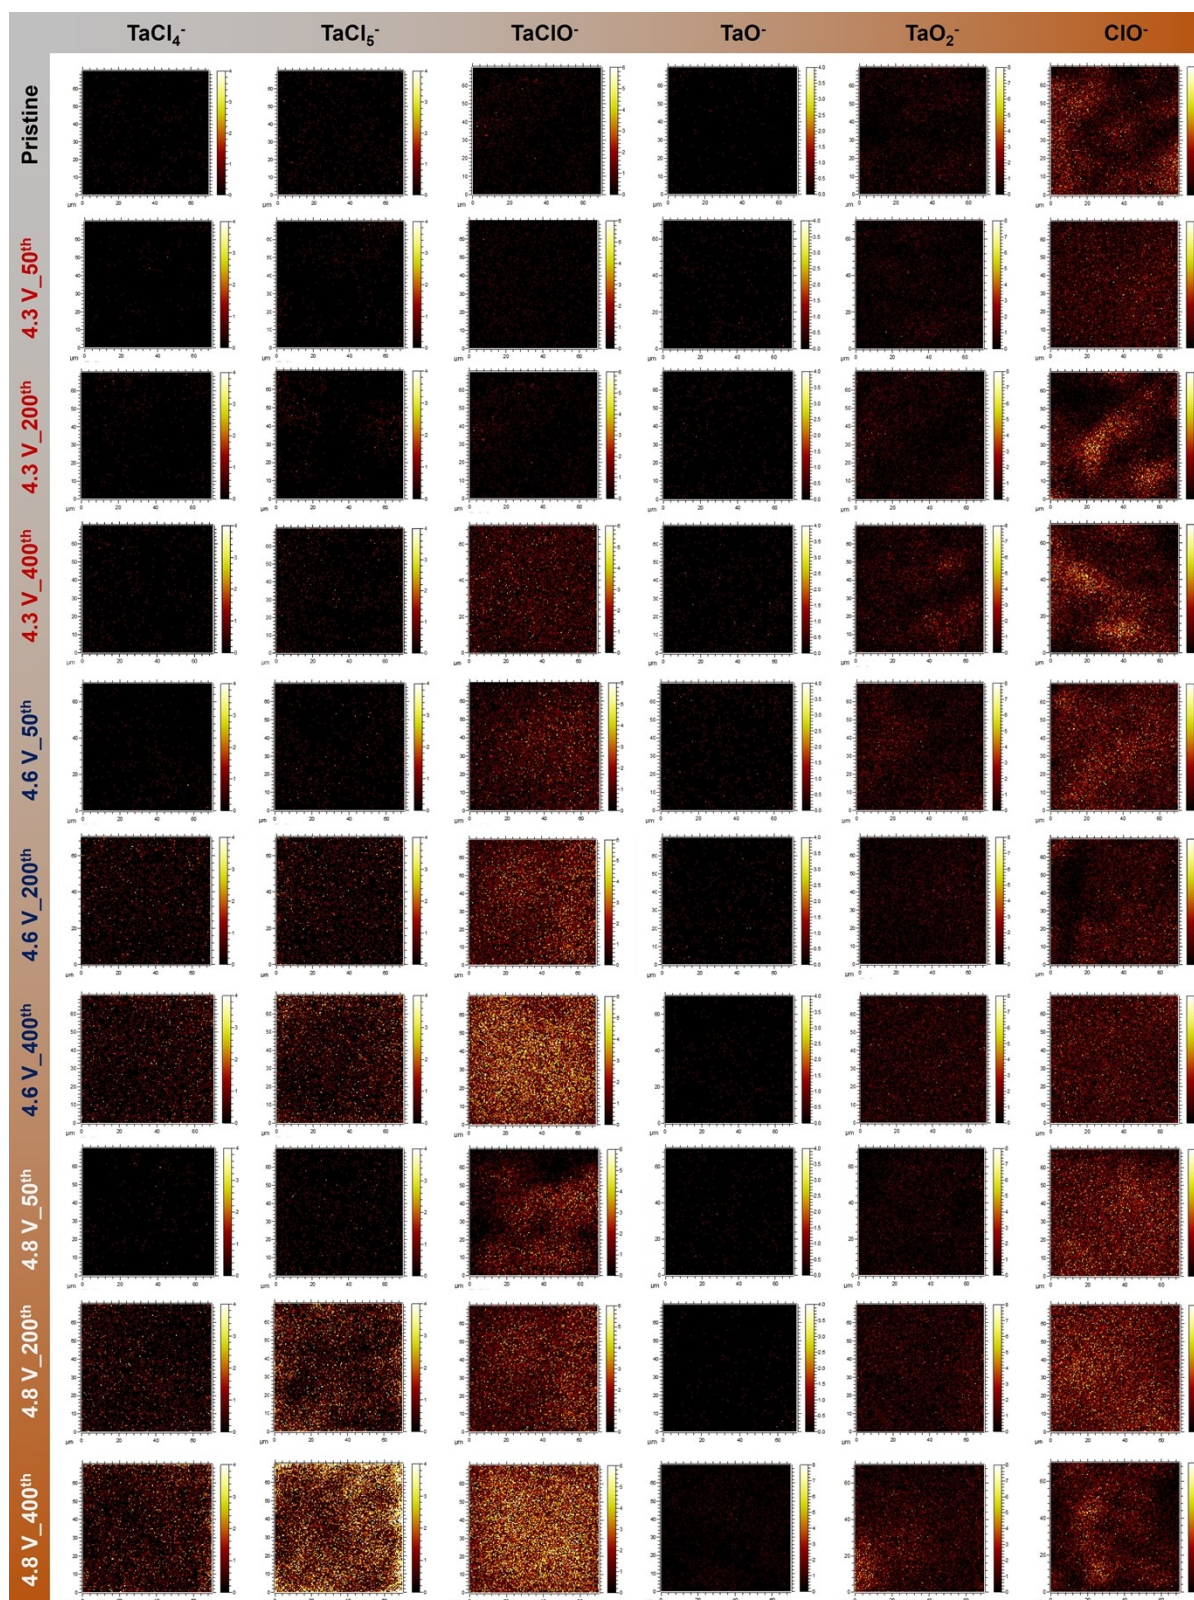

**Fig. S14** ToF-SIMS exemplary secondary ion images of negatively charged fragments of the composite cathodes with the pristine and cycled state at 4.3, 4.6, and 4.8 V.

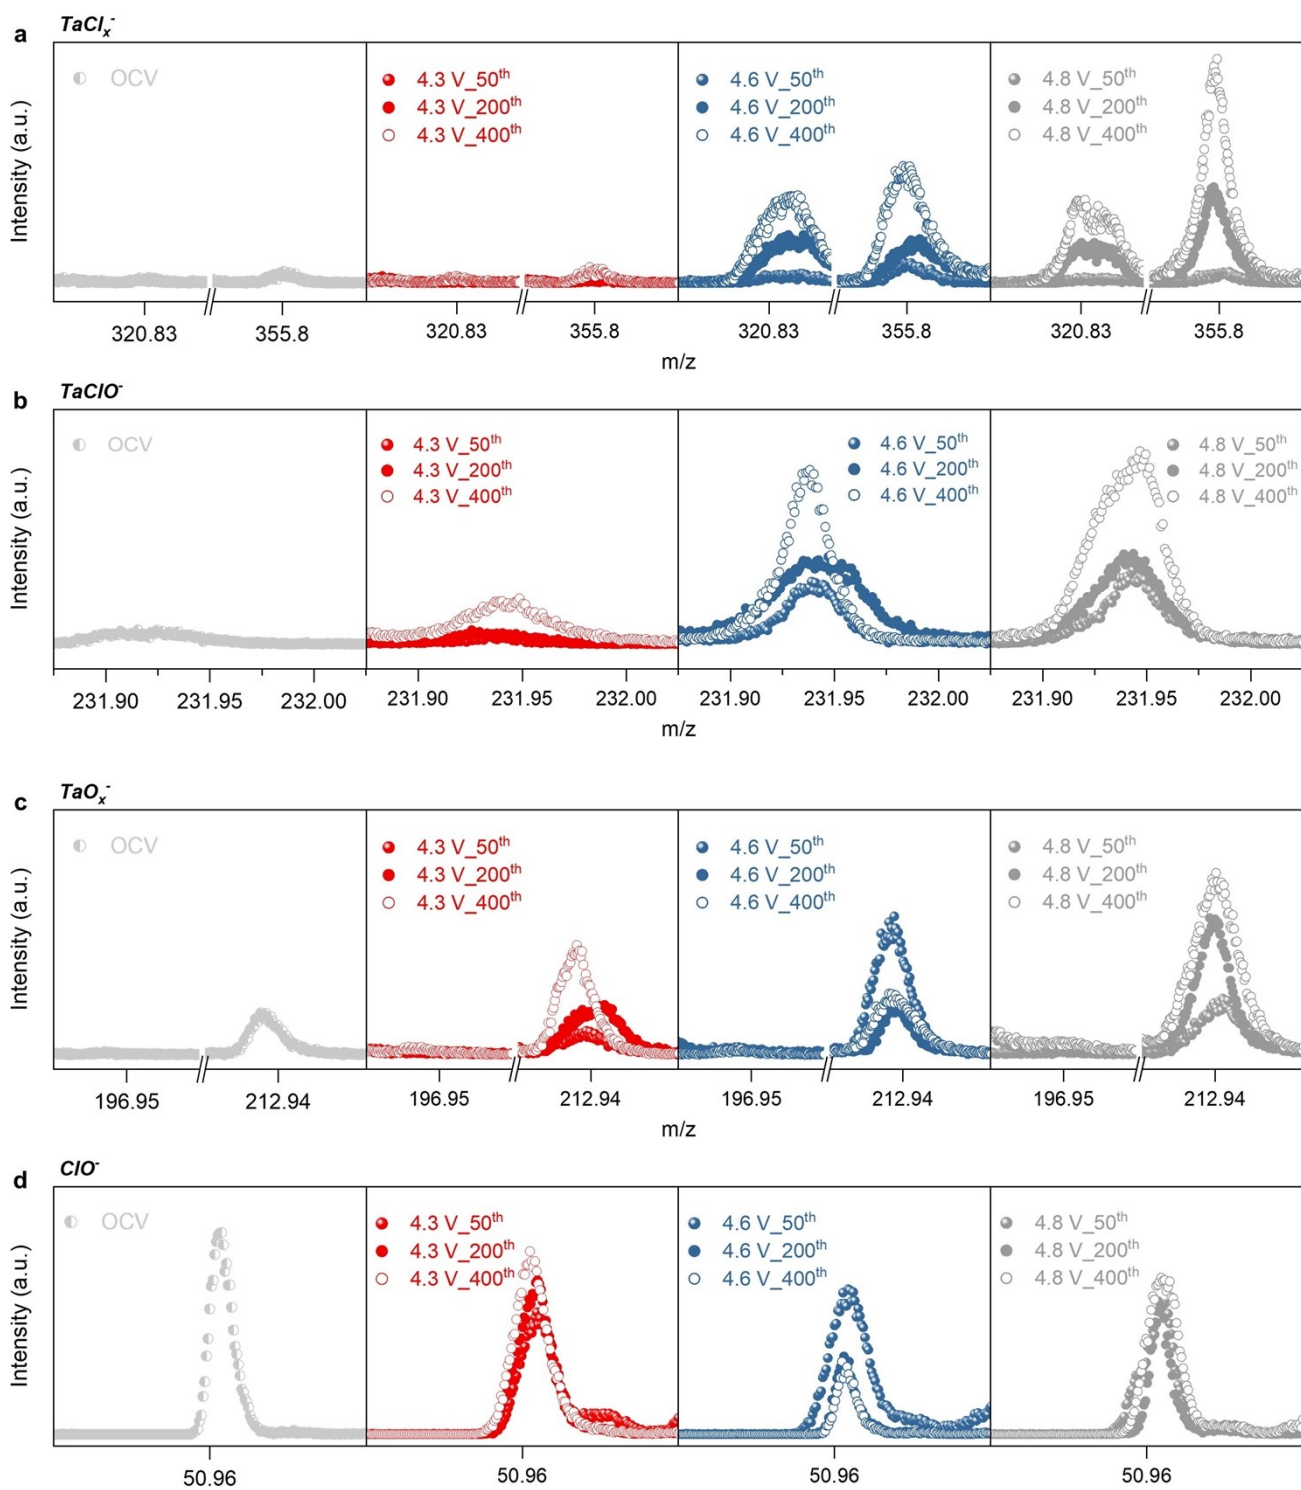

**Fig. S15 ToF-SIMS mass spectra of negatively charged fragments. a-d,** Evolution of the mass spectra of  $TaCl_x^-$  (a),  $TaClO^-$  (b),  $TaO_x^-$  (c), and  $ClO^-$  (d) fragments of the composite cathodes with the pristine and cycled states at 4.3, 4.6, and 4.8 V, respectively.

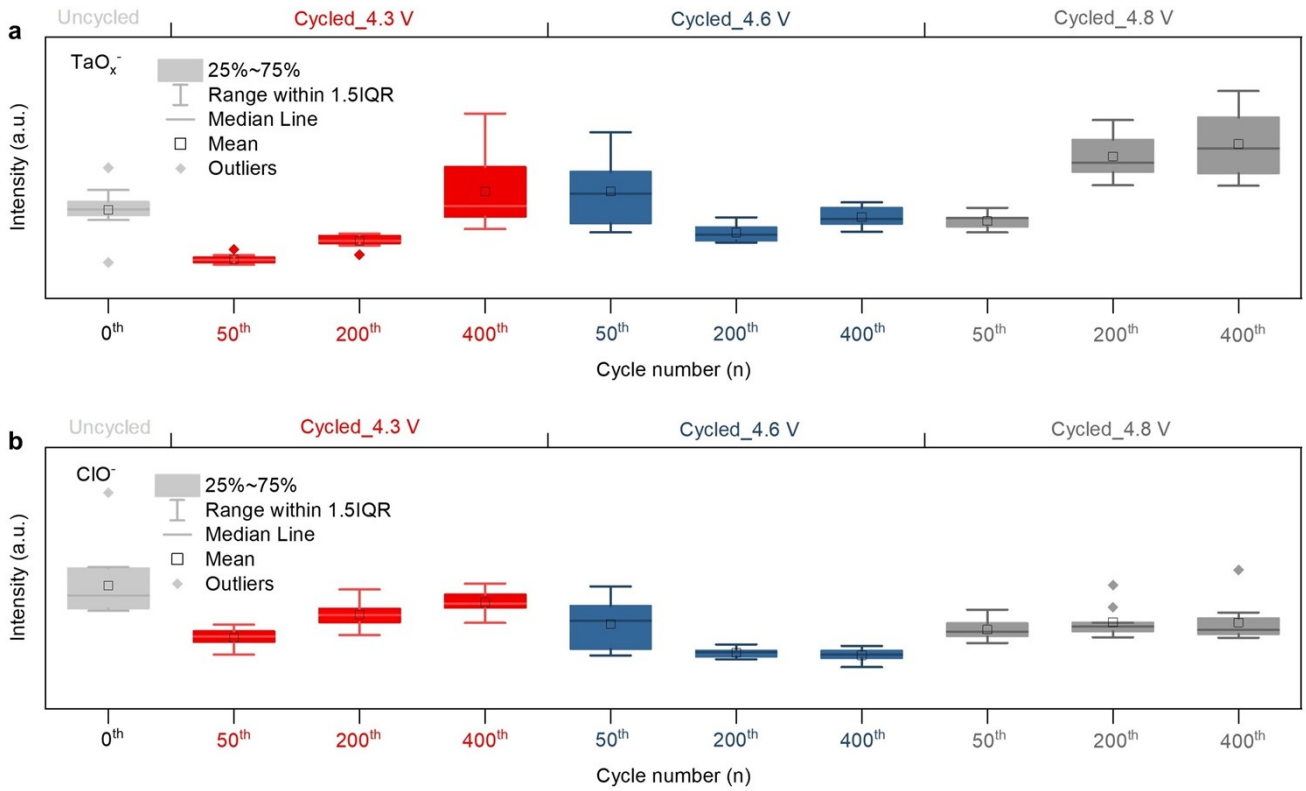

**Fig. S16 a-b,** Boxplots of the normalized intensity of TaO<sub>x</sub><sup>-</sup> (a) and ClO<sup>-</sup> (b) fragments of the composite cathodes with the OCV and cycled states at 4.3, 4.6, and 4.8 V, respectively.

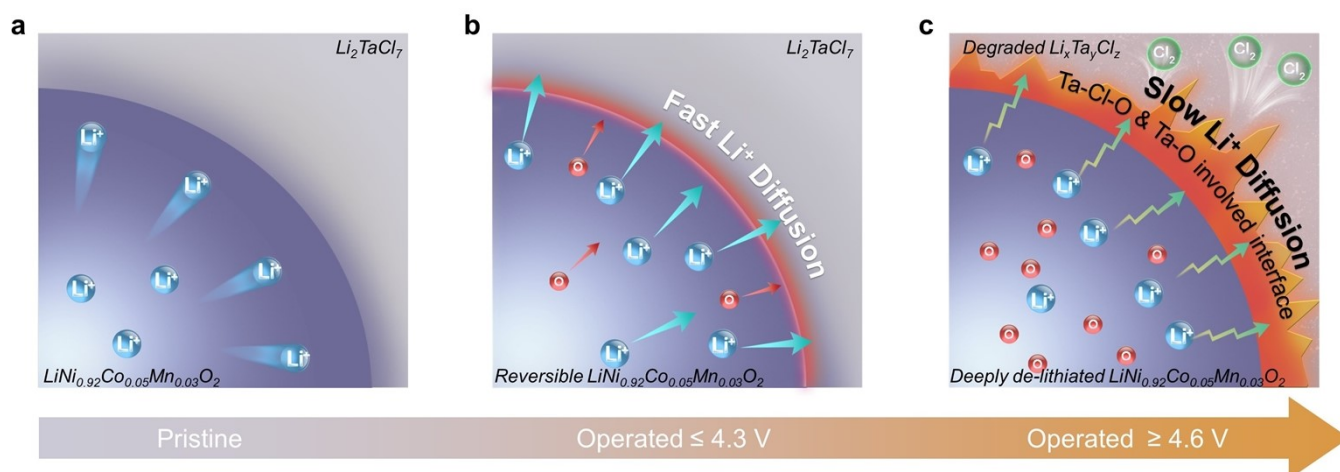

**Fig. S17** Scheme diagram of the degradation pathways of  $\text{Li}_2\text{TaCl}_7\text{-LiNi}_{0.92}\text{Co}_{0.05}\text{Mn}_{0.03}\text{O}_2$ .

**Note S1.** When operated at low cut-off voltages, stable cycling can be achieved due to the good oxidation stability of  $\text{Li}_2\text{TaCl}_7$  and reversible lithiation and de-lithiation processes of S-NCM92, particularly at cut-off voltages of 4.3 V and notably at 4.1 V. However, when operated at higher cut-off voltages of 4.6 and 4.8 V, oxidation reactions in  $\text{Li}_2\text{TaCl}_7$  occur, leading to the decomposition of the amorphous matrix. This decomposition disrupts the Li-ions conduction network, significantly increasing the resistance of migration of Li-ions and polarization of ASSLBs. Meanwhile, the lattice oxygen liberated from the charged S-NCM92 predominantly interacts with the  $\text{TaCl}_6^-$  sublattice within  $\text{Li}_2\text{TaCl}_7$ , leading to the formation of Ta-Cl-O and Ta-O species. These reactions generate side-products that obstruct Li-ion migration, significantly increasing interface resistance and adversely affecting the ASSLBs' capacity and lifespan.

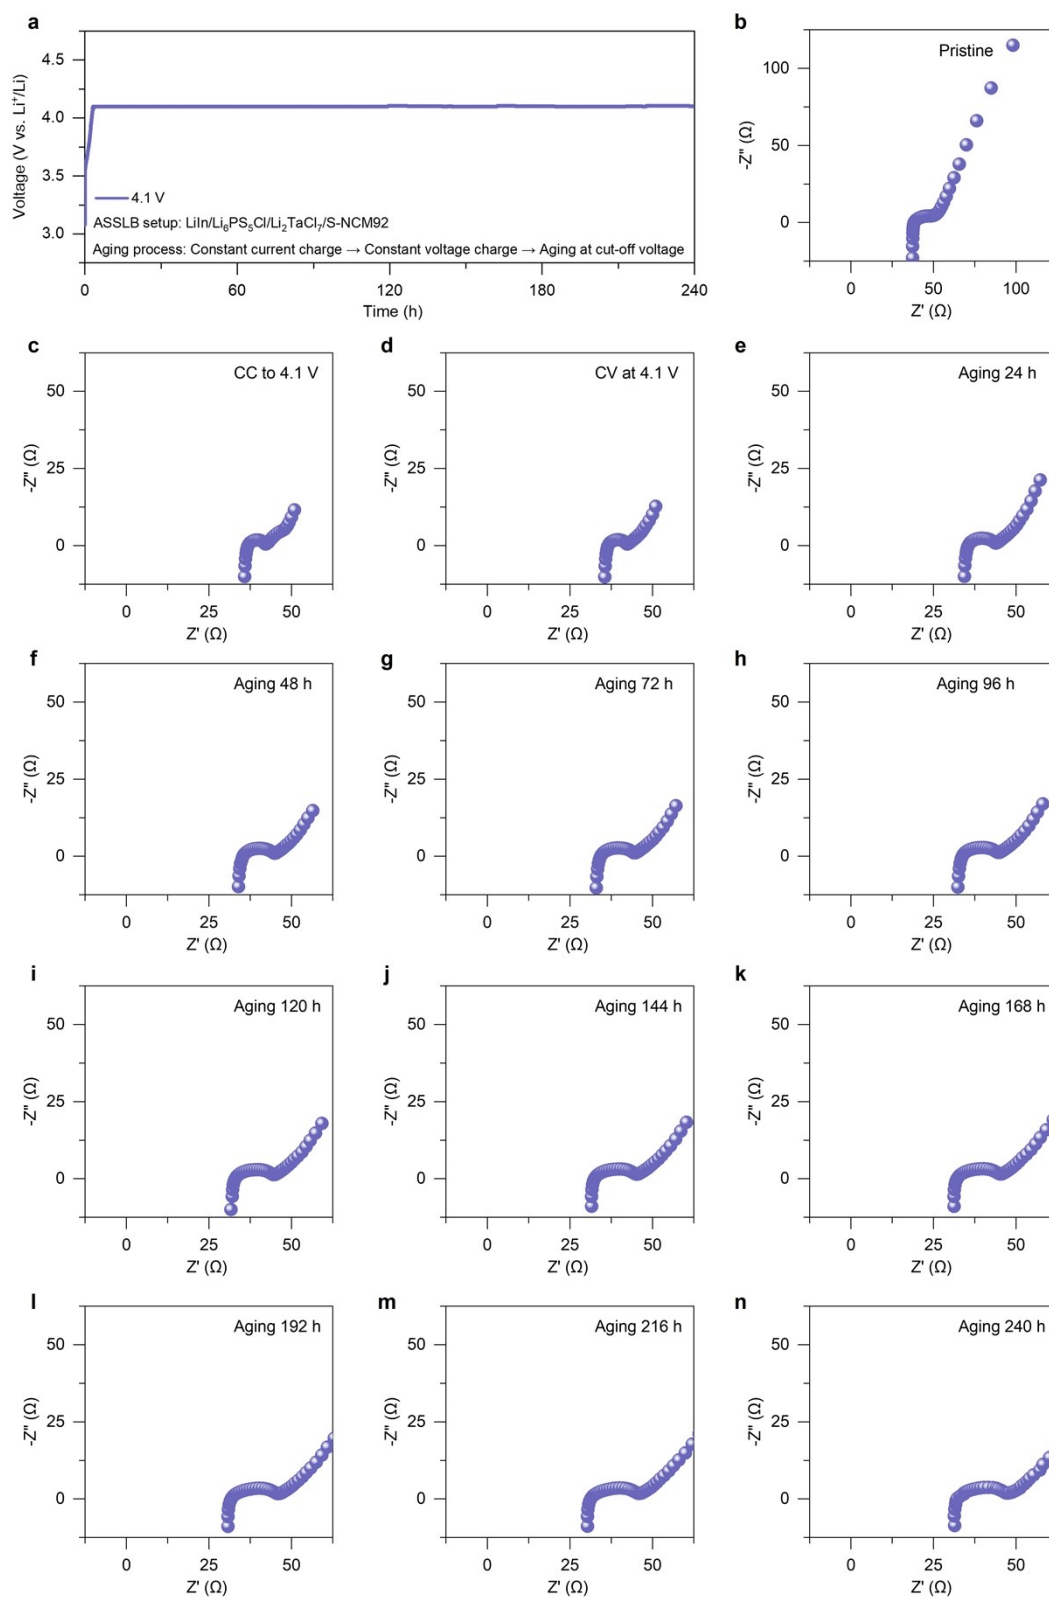

**Fig. S18 a**, Electrochemical curves of ASSLBs first charged to 4.1 V and then aged and held for 240 h. **b-n**, Nyquist plots of the EIS results of ASSLBs during the aging process with a constant voltage of 4.1 V.

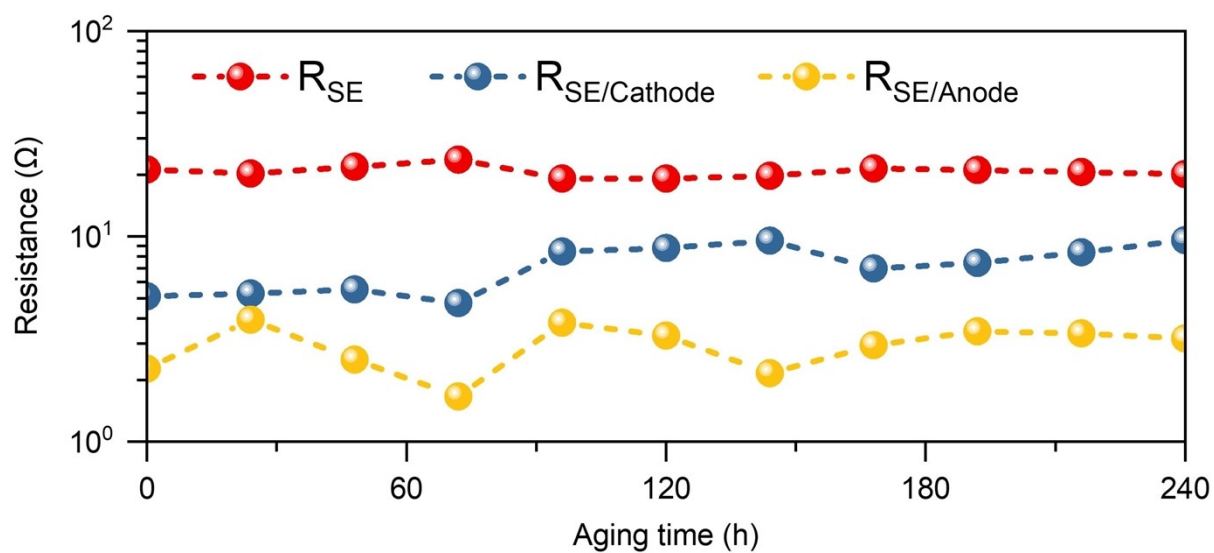

**Fig. S19 Interface stability of ASSLBs as a function of aging time with a charging voltage of 4.1 V revealed by in-situ EIS.** Evolution of fitted electrolyte resistance, cathode-electrolyte interface resistance, and anode-electrolyte interface resistance plotted as a function of aging time.

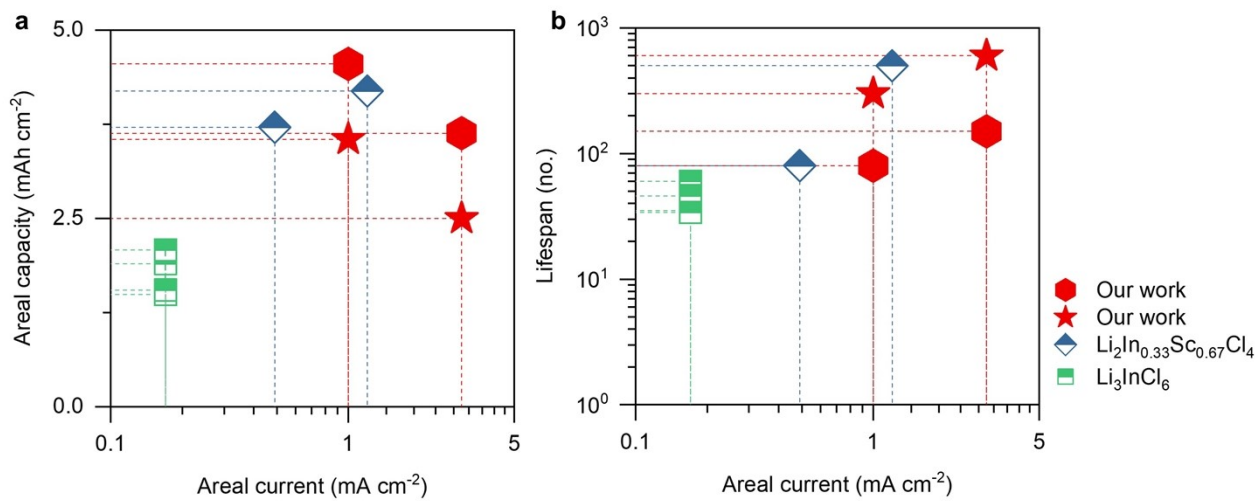

**Fig. S20 a-b**, Comparison of electrochemical performance of top-notch chloride SE-based ASSLBs, including areal capacity (a) and lifespan (b).

## Supplementary Tables

**Table S1.** Comparison of electrochemical performance, including discharge capacity and lifespan, of chlorides-based ASSLB with designed areal capacity over 3 mAh cm<sup>-2</sup> operated with different cut-off voltages, as exhibited in **Figure S20**.

| Chlorides                                                | Cathodes | Cut-off voltage (V) | Loading (g cm <sup>-2</sup> ) | Current (mA cm <sup>-2</sup> ) | Capacity (mAh g <sup>-1</sup> ) | Cycles (no.)   | Retention (%) | References                          |
|----------------------------------------------------------|----------|---------------------|-------------------------------|--------------------------------|---------------------------------|----------------|---------------|-------------------------------------|
| $\text{Li}_2\text{In}_{0.33}\text{Sc}_{0.67}\text{Cl}_4$ | LCO      | 4.5                 | 52.46                         | 1.2                            | 80                              | 500            | 100 (50 °C)   | Nat. Energy 2022, 7(1): 83-93       |
|                                                          | NCM85    | 4.3                 | 21.59                         | 0.49                           | 172                             | 80             | 108           |                                     |
| $\text{Li}_3\text{InCl}_6$                               | NCM622   | 4.2                 |                               |                                | 125                             |                | 60            | ACS Energy Lett. 2022, 7, 2979–2987 |
|                                                          |          | 4.3                 | 11.9                          | 0.17                           | 130                             | 70             | 35            |                                     |
|                                                          |          | 4.4                 |                               |                                | 160                             |                | 46            |                                     |
|                                                          |          | 4.5                 |                               |                                | 175                             |                | 34            |                                     |
| $\text{Li}_2\text{TaCl}_7$                               | NCM92    |                     | <i>24.3</i>                   | <i>1</i>                       | <i>187.1</i>                    | <i>110</i>     | <i>70</i>     | <i>Our work</i>                     |
|                                                          |          | <i>4.3</i>          | <i>25.2</i>                   | <i>3</i>                       | <i>144.1</i>                    | <i>220</i>     | <i>72</i>     |                                     |
|                                                          |          |                     | <i>23.6</i>                   | <i>1</i>                       | <i>150.2</i>                    | <i>200/300</i> | <i>91/80</i>  |                                     |
|                                                          |          | <i>4.1</i>          | <i>22.2</i>                   | <i>3</i>                       | <i>112.1</i>                    | <i>600</i>     | <i>82</i>     |                                     |
